# Supplementary material
Source: Springer Nature journal article supplement (https://www.springermedizin.de/resource/supplementary/12967_2013_1843_MOESM5_ESM.pdf/9574946)

*T. gondii* intracellular

proliferation - previous treatment  
(number of tachyzoites  $\times 10^4$ )

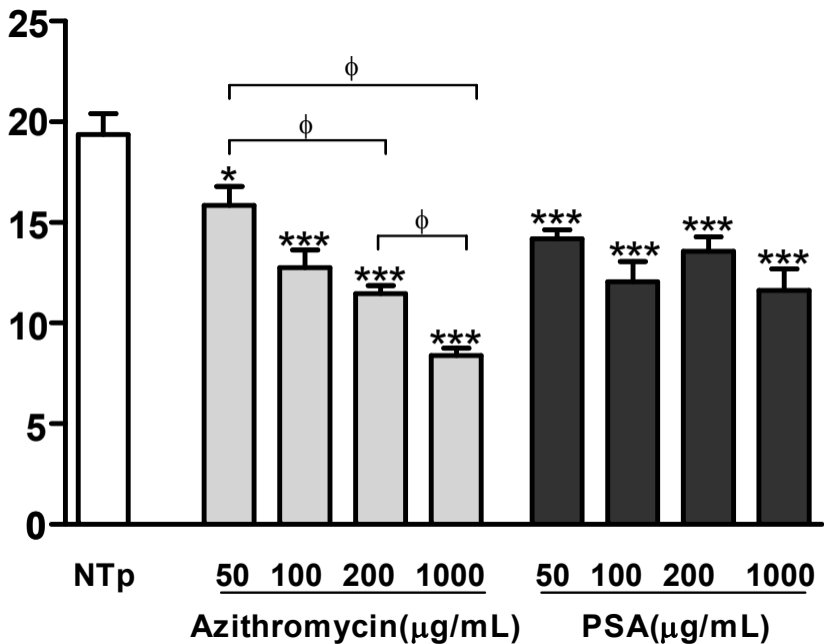

Supplement: MOESM5 [file 9574946]
